# Supplementary material for: Application of QM/MM and QM methods to investigate histone deacetylase 8
Source: Royal Society of Chemistry journal article supplement (doi:10.1039/c4md00471j), 2015-01-01
Supplement: c4md00471j1.pdf [file c4md00471j1.pdf]

# The Applicability of QM/MM in Structure Based Design: An Investigation of Histone Deacetylase 8.

M. Paul Gleeson and Duangkamol Gleeson

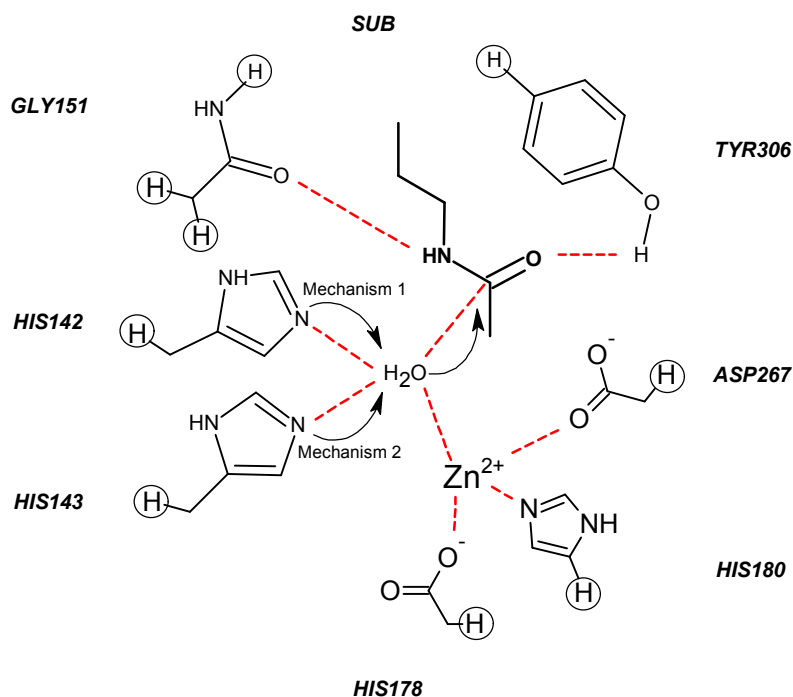

Figure S1 The QM model used for both the QM and QM/MM calculations.

| $\phi$ HID Mechanism | HDAC8              | H2O                   |
|----------------------|--------------------|-----------------------|
| REACT                | 0.0 (0.0) [0.0]    | 0.00 (0.00) [0.00]    |
| M1-INT               | 14.9 (18.1) [16.3] | 14.00 (9.29) [12.17]  |
| M2-INT               | 10.8 (11.5) [12.2] | 10.79 (6.93) [8.50]   |
| M1-PROD              | 0.6 (1.9) [2.3]    | 3.57 (-1.92) [1.33]   |
| M2-PROD              | -2.2 (-4.5) [-1.7] | 2.21 (-4.97) [-2.85]  |
| M1-TS1               | 17.8 (19.2) [24.1] | 21.11 (11.36) [17.93] |
| M2-TS1               | 17.9 (17.1) [17.5] | 19.22 (15.99) [19.65] |
| M1-TS2               | 42.3 (40.3) [43.1] | 42.12 (30.38) [37.96] |
| M2-TS2               | 12.1 (15.5) [15.2] | 13.83 (6.87) [10.11]  |
| TS3                  | 8.9 (16.0) [16.8]  | 16.04 (9.84) [13.38]  |

  

| HIP Mechanism | HDAC8              | H2O                   |
|---------------|--------------------|-----------------------|
| M3-REACT      | 0.0 (0.0) [0.0]    | 0.00 (0.00) [0.00]    |
| M4 REACT      | 11.5 (6.3) [8.0]   | 6.41 (7.01) [8.18]    |
| M3/4-INT      | 19.8 (23.3) [21.7] | 16.90 (16.61) [16.89] |
| M3/4 PROD     | -9.0 (-6.7) [-6.6] | 3.27 (-0.16) [2.09]   |
| TS0           | 10.6 (6.5) [14.7]  | 11.66 (9.64) [14.06]  |
| M3-TS1        | 22.3 (24.8) [27.2] | 25.43 (20.34) [26.35] |
| M4-TS1        | -                  | 21.33 (18.98) [21.35] |
| M3/4-TS2      | 29.9 (29.2) [30.9] | 17.96 (23.97) [17.92] |

**Table 1** Relative energies in Kcal/mol for the QM/MM and QM solvent model structures. Reported are the M06/6-31G(d) for CH,C,N,O and M06/LanI2DZ for transition metals. In brackets the single point energies for all atoms at the M06/6-31+G(d,p) level. The values in square brackets represent the free energy and single point energy corrected values.

| HID Mechanism | HIS 142 | HIS 143 | ASP 178 | HIS 180 | ASP 267 | TYR 306 | ZN   | SUB   |
|---------------|---------|---------|---------|---------|---------|---------|------|-------|
| REACT         | 0.10    | 0.57    | -0.69   | 0.14    | -0.68   | -0.06   | 0.86 | 0.22  |
| M1-INT        | 0.09    | 0.88    | -0.69   | 0.14    | -0.68   | -0.08   | 0.82 | -0.50 |
| M2-INT        | 0.55    | 0.45    | -0.69   | 0.14    | -0.68   | -0.08   | 0.82 | -0.48 |
| M1-PROD       | 0.04    | 0.88    | -0.68   | 0.14    | -0.68   | -0.06   | 0.83 | -0.24 |
| M2-PROD       | 0.55    | 0.10    | -0.69   | 0.14    | -0.68   | -0.06   | 0.86 | -0.48 |
| M1-TS1        | 0.11    | 0.73    | -0.69   | 0.14    | -0.67   | -0.06   | 0.85 | -0.44 |
| M2-TS1        | 0.88    | 0.06    | -0.71   | 0.15    | -0.69   | -0.08   | 0.82 | -0.41 |
| M1-TS2        | 0.11    | 0.78    | -0.70   | 0.14    | -0.69   | -0.08   | 0.84 | -0.39 |
| M2-TS2        | 0.58    | 0.24    | -0.69   | 0.14    | -0.67   | -0.06   | 0.85 | -0.41 |
| TS3           | 0.02    | 0.15    | -0.67   | 0.16    | -0.66   | -0.04   | 0.86 | 0.17  |

| HIP Mechanism | HIS 142 | HIS 143 | ASP 178 | HIS 180 | ASP 267 | TYR 306 | ZN   | SUB  |
|---------------|---------|---------|---------|---------|---------|---------|------|------|
| M3-REACT      | 0.70    | 0.16    | -0.67   | 0.16    | -0.64   | -0.04   | 0.87 | 0.44 |
| M4 REACT      | 0.14    | 0.75    | -0.67   | 0.16    | -0.63   | -0.04   | 0.86 | 0.43 |
| M3/4-INT      | 0.69    | 0.56    | -0.67   | 0.17    | -0.63   | -0.04   | 0.80 | 0.12 |
| M3/4 PROD     | 0.69    | 0.39    | -0.66   | 0.16    | -0.64   | -0.04   | 0.84 | 0.26 |
| TS0           | 0.65    | 0.48    | -0.68   | 0.16    | -0.65   | -0.04   | 0.86 | 0.23 |
| M3-TS1        | 0.63    | 0.54    | -0.67   | 0.15    | -0.62   | -0.05   | 0.83 | 0.20 |
| M4-TS1        | -       | -       | -       | -       | -       | -       | -    | -    |
| M3/4-TS2      | 0.66    | 0.27    | -0.67   | 0.16    | -0.62   | -0.05   | 0.84 | 0.41 |

**Table 2** The sum of the Mulliken charges on the atoms associated with each residues for all QM/MM optimized structures.

| HID Mechanism | HIS 142 | HIS 143 | ASP 178 | HIS 180 | ASP 267 | TYR 306 | ZN   | SUB   |
|---------------|---------|---------|---------|---------|---------|---------|------|-------|
| REACT         | 0.08    | 0.10    | -0.63   | 0.16    | -0.65   | -0.06   | 0.82 | 0.19  |
| M1-INT        | 0.09    | 0.84    | -0.63   | 0.17    | -0.66   | -0.09   | 0.75 | -0.47 |
| M2-INT        | 0.91    | 0.10    | -0.62   | 0.16    | -0.66   | -0.10   | 0.75 | -0.54 |
| M1-PROD       | -0.04   | 0.39    | -0.60   | 0.18    | -0.65   | -0.06   | 0.79 | 0.00  |
| M2-PROD       | 0.89    | 0.05    | -0.62   | 0.17    | -0.64   | -0.06   | 0.75 | -0.53 |
| M1-TS1        | 0.08    | 0.82    | -0.63   | 0.15    | -0.66   | -0.08   | 0.78 | -0.47 |
| M2-TS1        | 0.11    | 0.71    | -0.62   | 0.18    | -0.65   | -0.07   | 0.77 | -0.43 |
| M1-TS2        | 0.84    | 0.09    | -0.63   | 0.15    | -0.66   | -0.09   | 0.80 | -0.51 |
| M2-TS2        | 0.84    | 0.06    | -0.59   | 0.14    | -0.66   | -0.08   | 0.77 | -0.47 |
| TS3           | 0.04    | 0.09    | -0.59   | 0.18    | -0.63   | -0.04   | 0.79 | 0.17  |

| HIP Mechanism | HIS 142 | HIS 143 | ASP 178 | HIS 180 | ASP 267 | TYR 306 | ZN   | SUB   |
|---------------|---------|---------|---------|---------|---------|---------|------|-------|
| M3-REACT      | 0.90    | 0.14    | -0.61   | 0.17    | -0.64   | -0.05   | 0.80 | 0.30  |
| M4 REACT      | 0.10    | 0.92    | -0.63   | 0.18    | -0.62   | -0.06   | 0.83 | 0.28  |
| M3/4-INT      | 0.91    | 0.88    | -0.58   | 0.18    | -0.65   | -0.08   | 0.78 | -0.43 |
| M3/4 PROD     | 0.92    | 0.91    | -0.61   | 0.17    | -0.65   | -0.07   | 0.80 | -0.47 |
| TS0           | 0.74    | 0.85    | -0.62   | 0.17    | -0.65   | -0.05   | 0.79 | -0.23 |
| M3-TS1        | 0.94    | 0.85    | -0.58   | 0.18    | -0.66   | -0.09   | 0.81 | -0.45 |
| M4-TS1        | 0.87    | 0.92    | -0.62   | 0.16    | -0.66   | -0.07   | 0.82 | -0.42 |
| M3/4-TS2      | 0.91    | 0.80    | -0.58   | 0.17    | -0.65   | -0.08   | 0.79 | -0.37 |

**Table 3** The sum of the Mulliken charges on the atoms associated with each residues for all QM optimized structures.
